# Supplementary material
Source: ML conference proceedings conference paper supplement (https://openaccess.thecvf.com/content/CVPR2026/html/Park_Medic-AD_Towards_Medical_CVPR_2026_paper.html)
Supplement: Supplementary file 1 [file Park_Medic-AD_Towards_Medical_CVPR_2026_supplemental.pdf]

# MEDIC-AD: Towards Medical Vision-Language Model’s Clinical Intelligence

## Supplementary Material

This supplementary document provides additional details supporting the main paper.

### A. Chat Template

To incorporate the new `<Ano>` and `<Diff>` tokens, we update the original chat template to provide more explicit cues for abnormality detection and change description (Fig. 6). While the original template simply presented two images and asked what had changed, MEDIC-AD template attaches anomaly tokens (`<Ano>`) to each image and adds diff tokens (`<Diff>`) to the change question. This enriches the prompt with clinically aligned signals, enabling the model to produce more accurate abnormality identification and localized change explanations.

| Original Template                                                                                                                              | Medic-AD Template                                                                                                                                                                                                                                                                                                                      |
|------------------------------------------------------------------------------------------------------------------------------------------------|----------------------------------------------------------------------------------------------------------------------------------------------------------------------------------------------------------------------------------------------------------------------------------------------------------------------------------------|
| Main image: <code>&lt;image&gt;</code> ,<br>Reference image: <code>&lt;image&gt;</code> ,<br>What has changed compared to the reference image? | Main image: <code>&lt;image&gt;</code><br><b>(Anomaly tokens: <code>&lt;Anomaly_tokens&gt;</code>),</b><br>Reference image: <code>&lt;image&gt;</code><br><b>(Anomaly tokens: <code>&lt;Anomaly_tokens&gt;</code>),</b><br>What has changed compared to the reference image?<br><b>(Diff tokens: <code>&lt;Diff_tokens&gt;</code>)</b> |

Figure 6. Comparison of chat template between original and MEDIC-AD, utilizing `<Ano>` and `<Diff>` tokens.

### B. Training Details

All training stages employ the AdamW optimizer together with a cosine learning rate scheduler. **Stage 1** is trained on 3 H200 GPUs for one epoch (3 hours) using an initial learning rate of  $1e - 4$  and a batch size of 16. **Stage 2** uses the same hardware and optimization settings, trained for a single epoch (6 hours). Both Stage 1 and Stage 2 are optimized using the standard LLM cross-entropy loss. **Stage 3** is trained for 100 epochs (15 hours) with an initial learning rate of  $1e - 3$  and a batch size of 32, optimizing the DiceCE loss. The parameter size of additional modules introduced in MEDIC-AD follows the specifications summarized in Tab. 6.

### C. Additional experiments

#### C.1. Generic-Medical VQA

In this section, we assess the general medical reasoning capability of MEDIC-AD by benchmarking it on a diverse set of established medical VQA and QA datasets,

Table 6. Parameter size of MEDIC-AD’s additional modules.

| Category                          | Param. Size |
|-----------------------------------|-------------|
| Visual soft prompts               | 51K         |
| <code>&lt;Ano&gt;</code> modules  | 40M         |
| <code>&lt;Diff&gt;</code> modules | 40M         |
| Heatmap modules                   | 48M         |

including VQA-RAD [33], SLAKE [51], PathVQA [19], MMMU Med [62], PMC-VQA [63] for visual reasoning, and MedMCQA [44], PubMedQA [28], MedQA [27], MedXpertQA [68] for text-only medical QA. As shown in Tab. 7 and Tab. 8, MEDIC-AD preserves broad medical knowledge acquired during pretraining while maintaining strong question-answering competence across both visual and non-visual domains. Notably, when comparing against a fully fine-tuned Lingshu baseline—trained end-to-end on the Stage 1 and Stage 2 datasets—we observe a pronounced degradation in general medical knowledge, leading to substantial drops across benchmarks. This contrast underscores that MEDIC-AD’s stage-wise design, which updates only targeted components such as `<Ano>` and `<Diff>`, effectively avoids catastrophic forgetting and retains general-domain medical reasoning capabilities.

#### C.2. Results on hyperparameter experiments

The experimental results on hyperparameters summarized in Fig. 5 are provided in full detail in Tab. 9, offering a comprehensive breakdown of each experimental configuration.

#### C.3. Stage-wise vs. Joint Training

Tab. 10 shows that stage-wise training consistently outperforms joint optimization under identical experimental settings. While joint training still yields performance improvements over the baseline, stage-wise optimization achieves superior results by providing a more stable learning curriculum. This result suggests that the proposed curriculum enables each stage-specific objective to be effectively internalized before introducing additional supervision signals.

Table 7. Results on medical VQAs (VQA RAD [33], SLAKE [51], PathVQA [19], MMMU Med [62]), and PMC VQA [63]).

| Model                     | Size | VQA RAD     | SLAKE       | PathVQA     | MMMU Med    | PMC VQA     |
|---------------------------|------|-------------|-------------|-------------|-------------|-------------|
| LLaVA-Med                 | 7B   | 53.7        | 48.0        | 32.5        | 29.3        | 30.5        |
| Citrus-V                  | 8B   | 64.3        | <b>84.9</b> | <b>62.0</b> | 46.4        | 55.6        |
| Lingshu                   | 7B   | <b>67.9</b> | 83.1        | 61.9        | 54.0        | 56.0        |
| Lingshu (full finetuning) | 7B   | 40.8        | 38.4        | 45.3        | 24.8        | 6.4         |
| <b>MEDIC-AD</b>           | 7B   | 64.3        | 78.5        | 56.5        | <b>54.2</b> | <b>56.1</b> |

Table 8. Results on medical QAs (MedMCQA [44], PubMedQA [28], MedQA [27], and MedXpertQA [68]).

| Model                     | Size | MedMCQA     | PubMedQA    | MedQA       | MedXpertQA  |
|---------------------------|------|-------------|-------------|-------------|-------------|
| LLaVA-Med                 | 7B   | 39.4        | 26.4        | 42.0        | 9.9         |
| Citrus-V                  | 8B   | 55.1        | 74.8        | <b>64.9</b> | <b>16.9</b> |
| Lingshu                   | 7B   | 55.9        | 75.4        | 63.3        | 16.5        |
| Lingshu (full finetuning) | 7B   | 1.8         | 35.4        | 24.4        | 10.9        |
| <b>MEDIC-AD</b>           | 7B   | <b>56.7</b> | <b>75.6</b> | 63.6        | 16.5        |

Table 9. Ablation on pooling size and soft prompt counts. We report average F1 and MMXU (Overall) for each configuration.

| Category                  | Config. Value | Avg. F1 | MMXU  |
|---------------------------|---------------|---------|-------|
| <b>Pooling Size</b>       | 1             | 90.5    | 0.620 |
|                           | 2             | 90.2    | 0.631 |
|                           | 4             | 91.6    | 0.635 |
|                           | 8             | 91.7    | 0.623 |
| <b>Soft Prompt Counts</b> | 0             | 90.6    | 0.625 |
|                           | 5             | 91.8    | 0.630 |
|                           | 10            | 91.6    | 0.635 |
|                           | 20            | 89.2    | 0.626 |

Table 10. Comparison between Stage-wise and Joint training.

| Model                        | AVG. F1     | MMXU         |
|------------------------------|-------------|--------------|
| Lingshu-7B                   | 88.7        | 0.620        |
| Medic-AD (Joint)             | <u>89.7</u> | <u>0.630</u> |
| <b>Medic-AD (Stage-wise)</b> | <b>91.6</b> | <b>0.655</b> |
